# Supplementary material
Source: publisher figshare collection journal article supplement (https://rs.figshare.com/ndownloader/files/9112669)

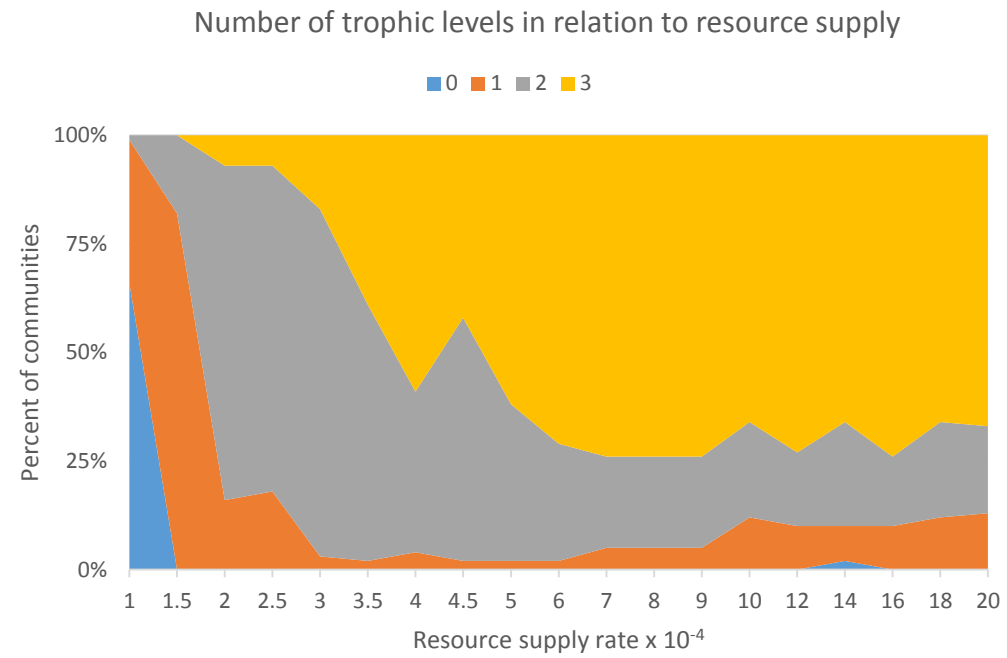

Supplementary Figure 4. Number of trophic levels is limited by the resource supply rate.

Supplement: Supplementary file 1 [file 9112669]
